# Supplementary material for: Multi-omics Data Analyses Construct TME and Identify the Immune-Related Prognosis Signatures in Human LUAD
Source: PubMed Central journal article supplement — Mol Ther Nucleic Acids. 2020 Jul 23;21:860–73. doi: 10.1016/j.omtn.2020.07.024 (PMC7452010; doi:10.1016/j.omtn.2020.07.024), 2020-07-23
Supplement: mmc1.pdf [file mmc1.pdf]

OMTN, Volume 21

## **Supplemental Information**

### **Multi-omics Data Analyses Construct TME and Identify the Immune-Related Prognosis Signatures in Human LUAD**

**Yuwei Zhang, Minglei Yang, Derry Minyao Ng, Maria Haleem, Tianfei Yi, Shiyun Hu, Huangkai Zhu, Guofang Zhao, and Qi Liao**

# **Supplemental Figures**

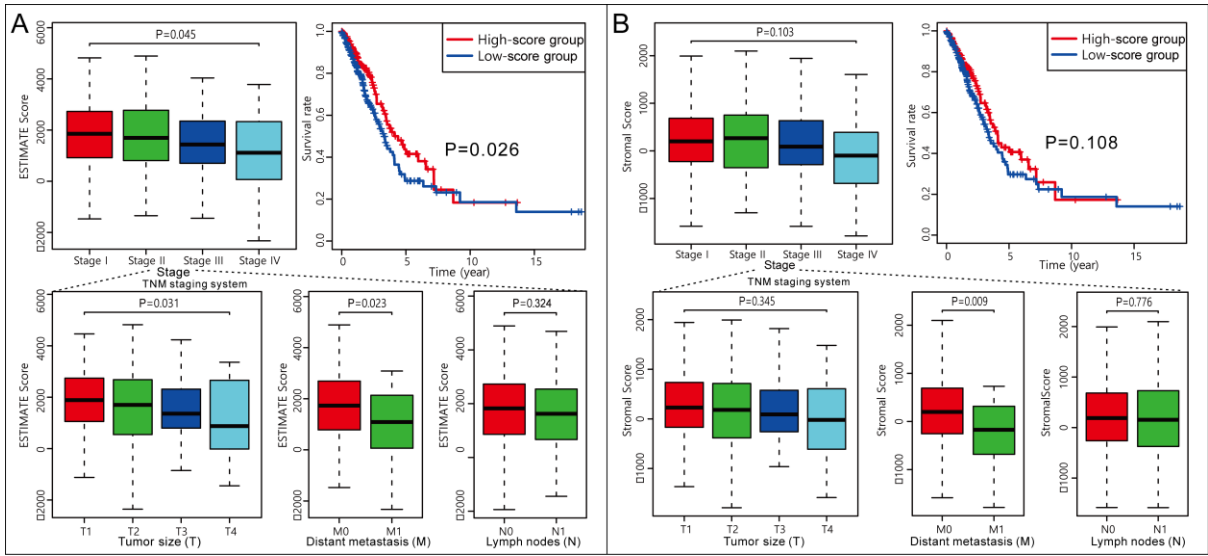

**Figure S1** The comparisons of the distributions of **(A)** estimate scores and **(B)** stromal scores on TNM stage, tumor size, distant metastasis, lymph nodes and overall survival time.

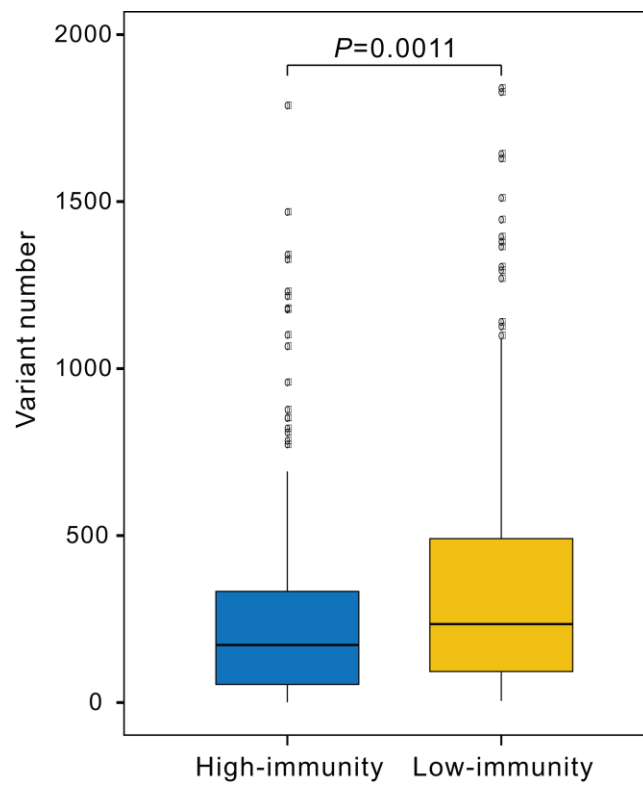

**Figure S2** The comparison of the variant number between high-immunity and low-immunity cohorts.

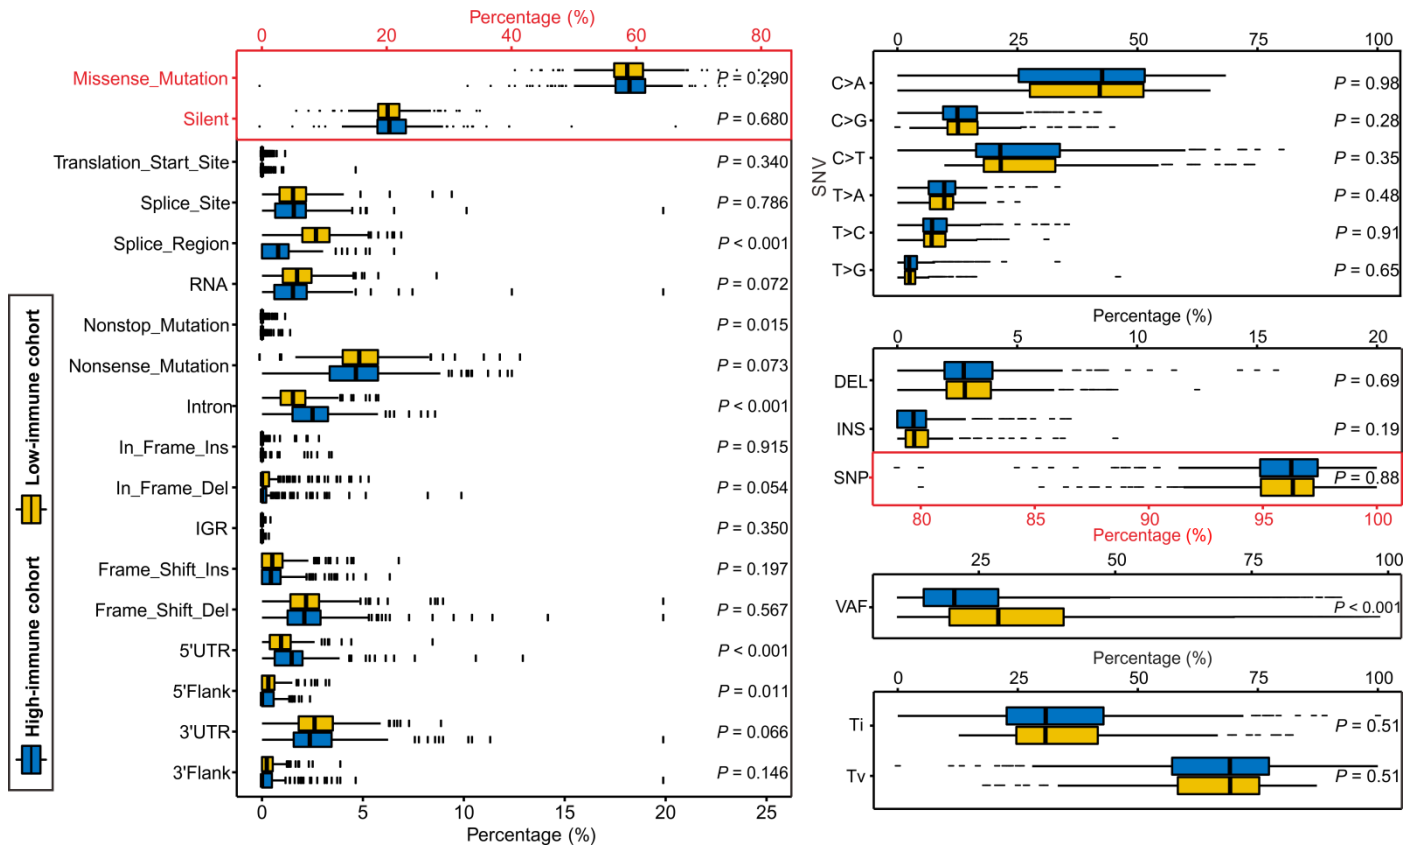

**Figure S3** The percentages of various mutation types in high-immunity and low-immunity cohorts. Boxplots respectively display the comparisons of the percentages of (A) every mutation type classified by effects, (B) SNV, (C) INDEL and SNP, and (D) DNA substitution types including transition (Ti) and transversion (Tv).

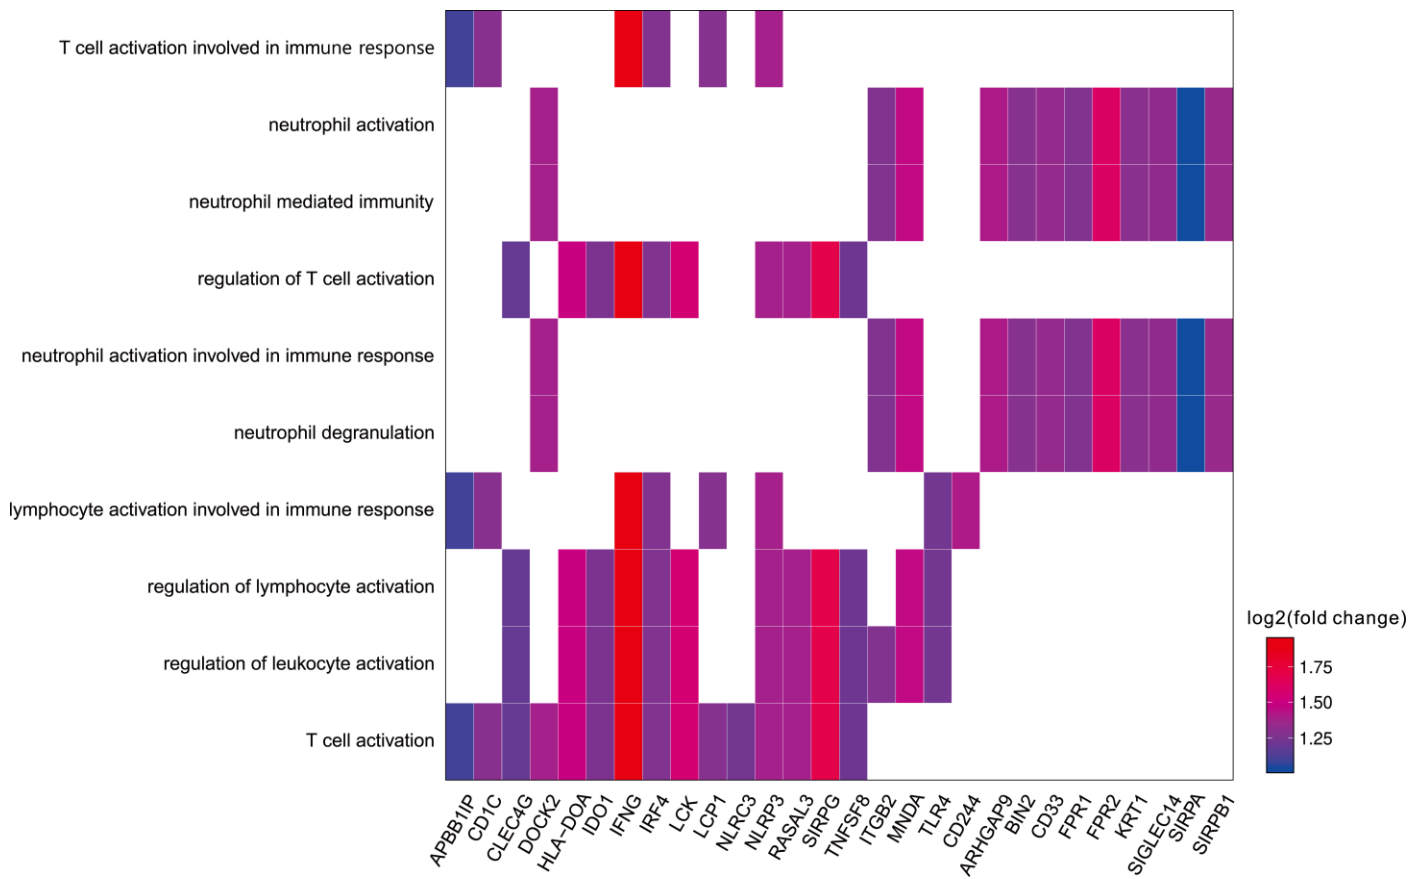

**Figure S4 Functional enrichment analysis of the hypermethylation-associated up-regulated DEGs in high-immunity cohort.** The y-axis and x-axis respectively represent the significant GOBP terms and the genes in terms. The color of the cells represents the gradient of expression fold change.

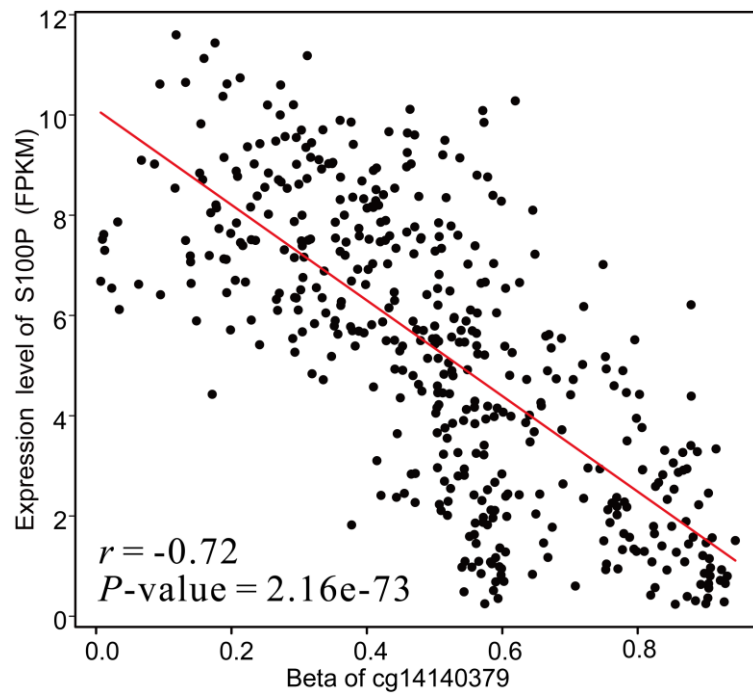

**Figure S5** The correlation between the expression level and the beta value of *S100P*.

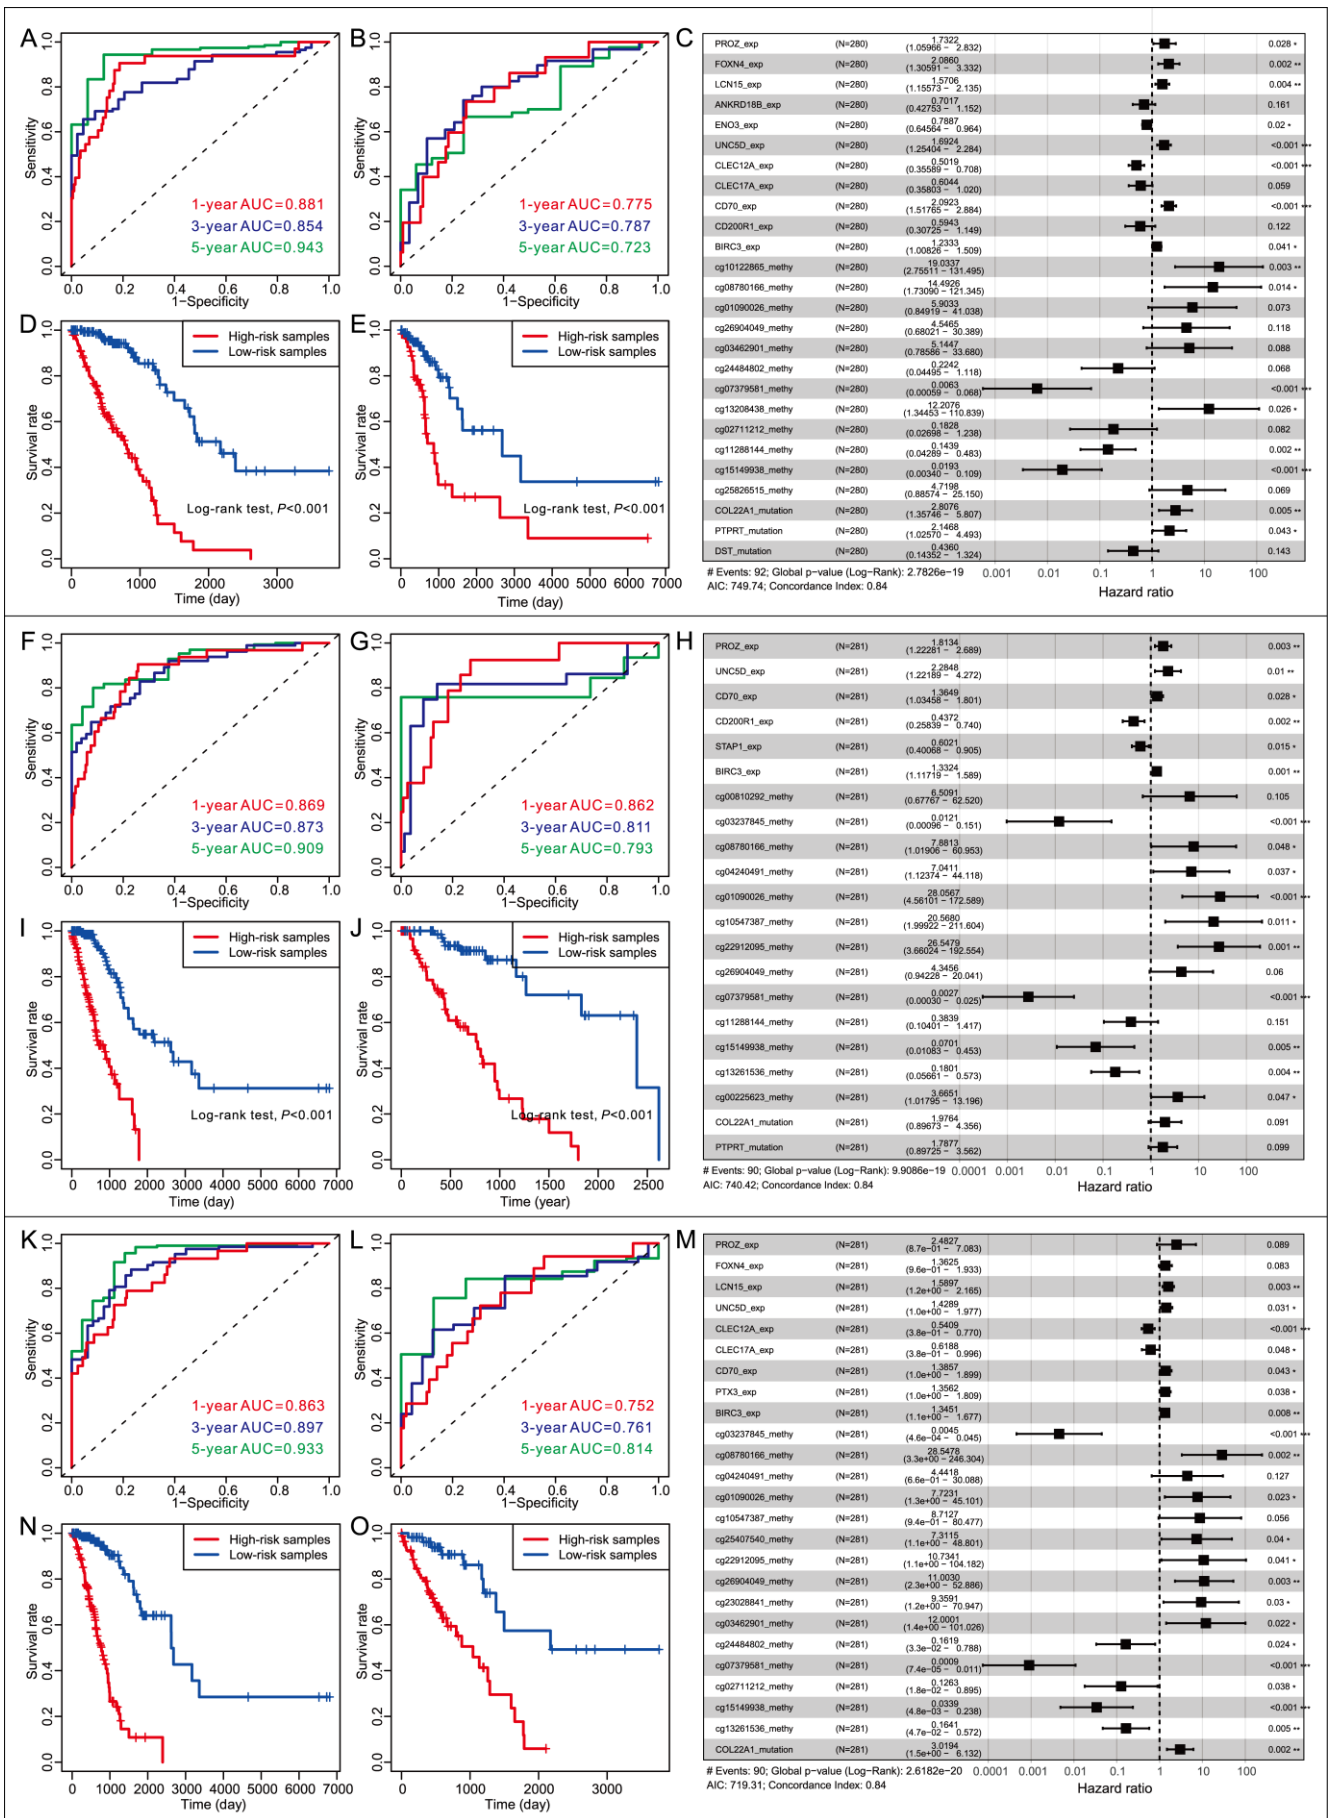

**Figure S6** The performance of the trained model 1 (A-E), model 2 (F-J) and model 3 (K-O). Subplot (A/F/K) and (B/G/L) show the roc curves of the risk score for 1-year, 3-year and 5-year survival prediction on the training set and test set, respectively. Subplot (D/I/N) and (E/J/O) are the Kaplan-Meier curves showing the independent relevance between overall survival time and risk scores when training sets and test sets were respectively used. Subplot C, H, and M are the forest plots showing the prognostic impact of variables.



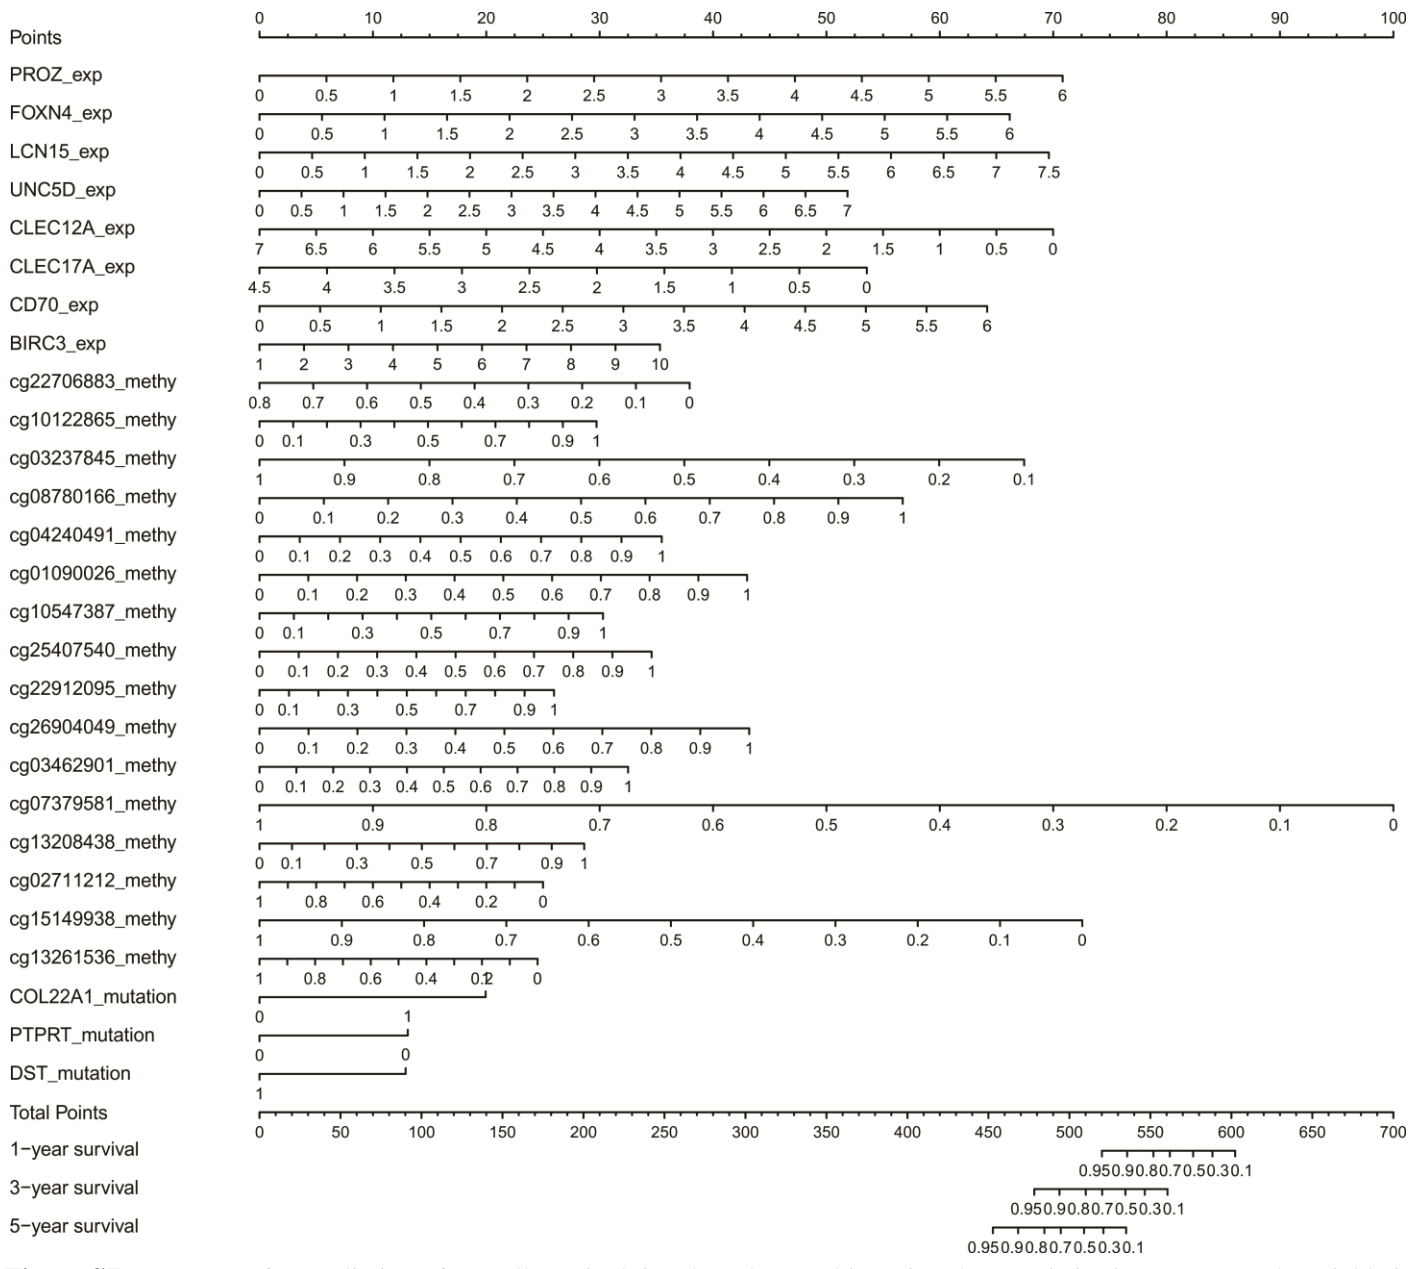

**Figure S7** Nomogram for prediction of overall survival time based on multi-Omics characteristics in LUAD. Each variable is assigned a point value. The total points in the bottom panel can be used to estimate the probability of 1-year, 3-year and 5-year survival.

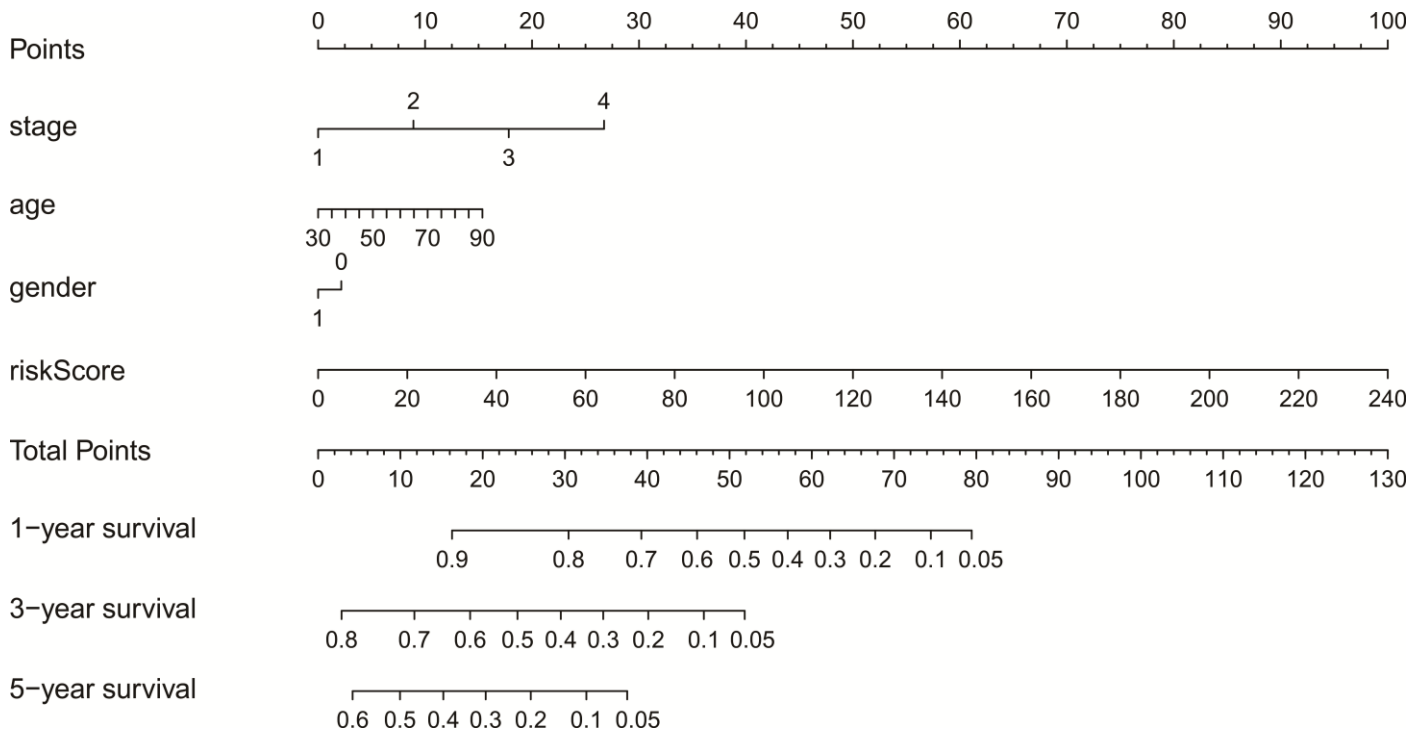

**Figure S8** Nomogram for prediction of overall survival time based on the combination of multi-Omics characteristics and clinical factors in LUAD. Each variable is assigned a point value. The total points in the bottom panel can be used to estimate the probability of 1-year, 3-year and 5-year survival.

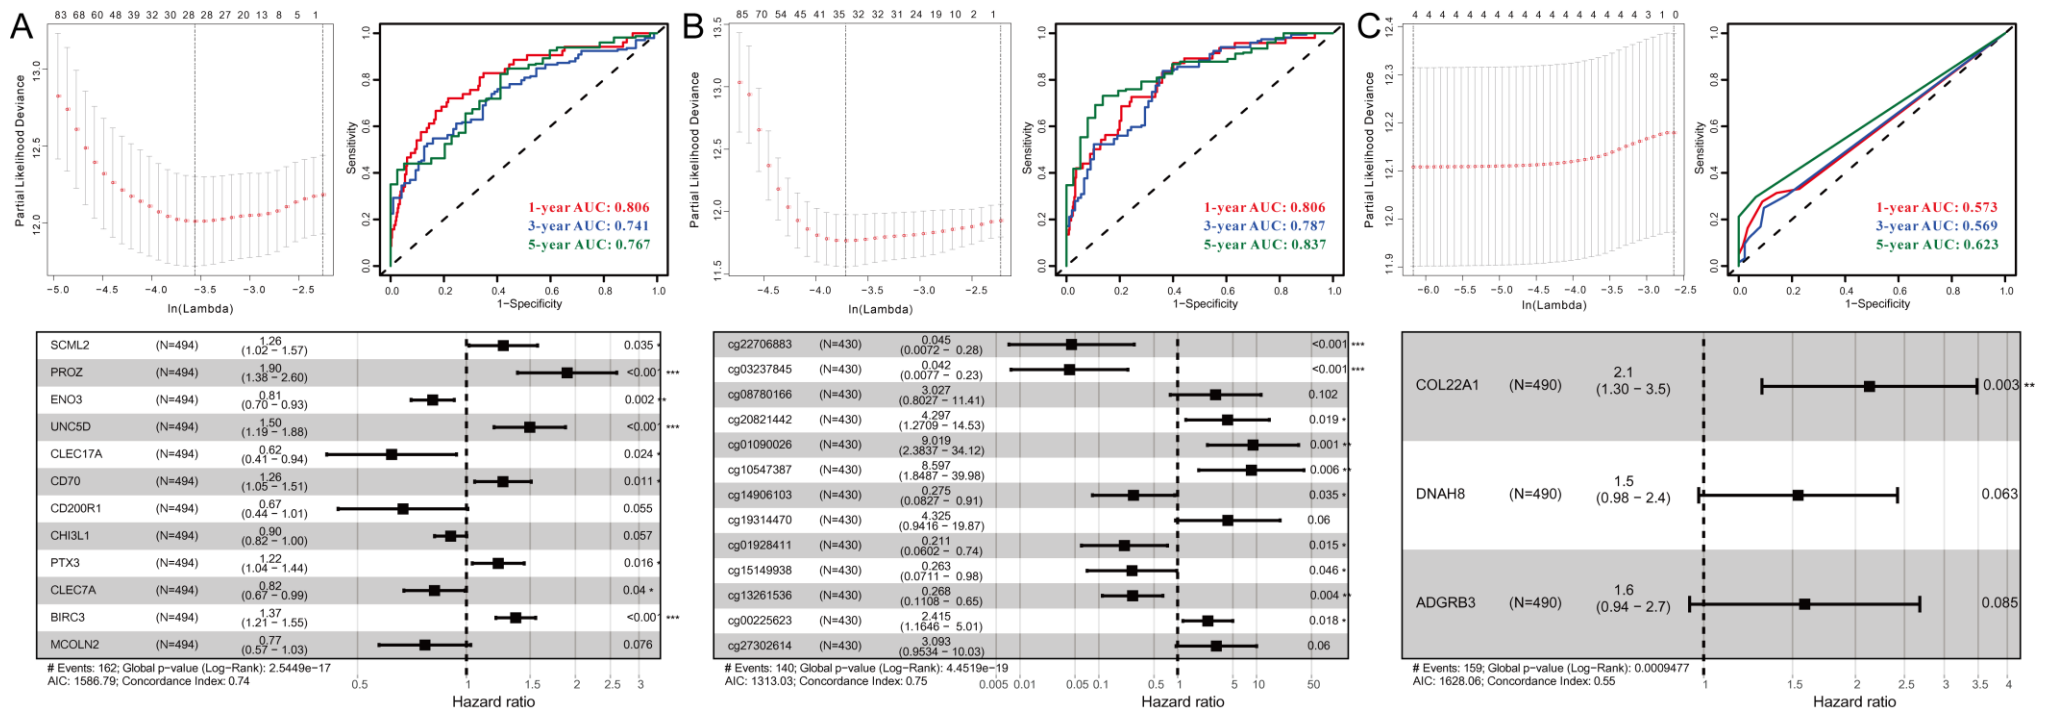

**Figure S9** The prognosis prediction models based on (A) gene expression change, (B) DNA methylation and (C) somatic mutation.

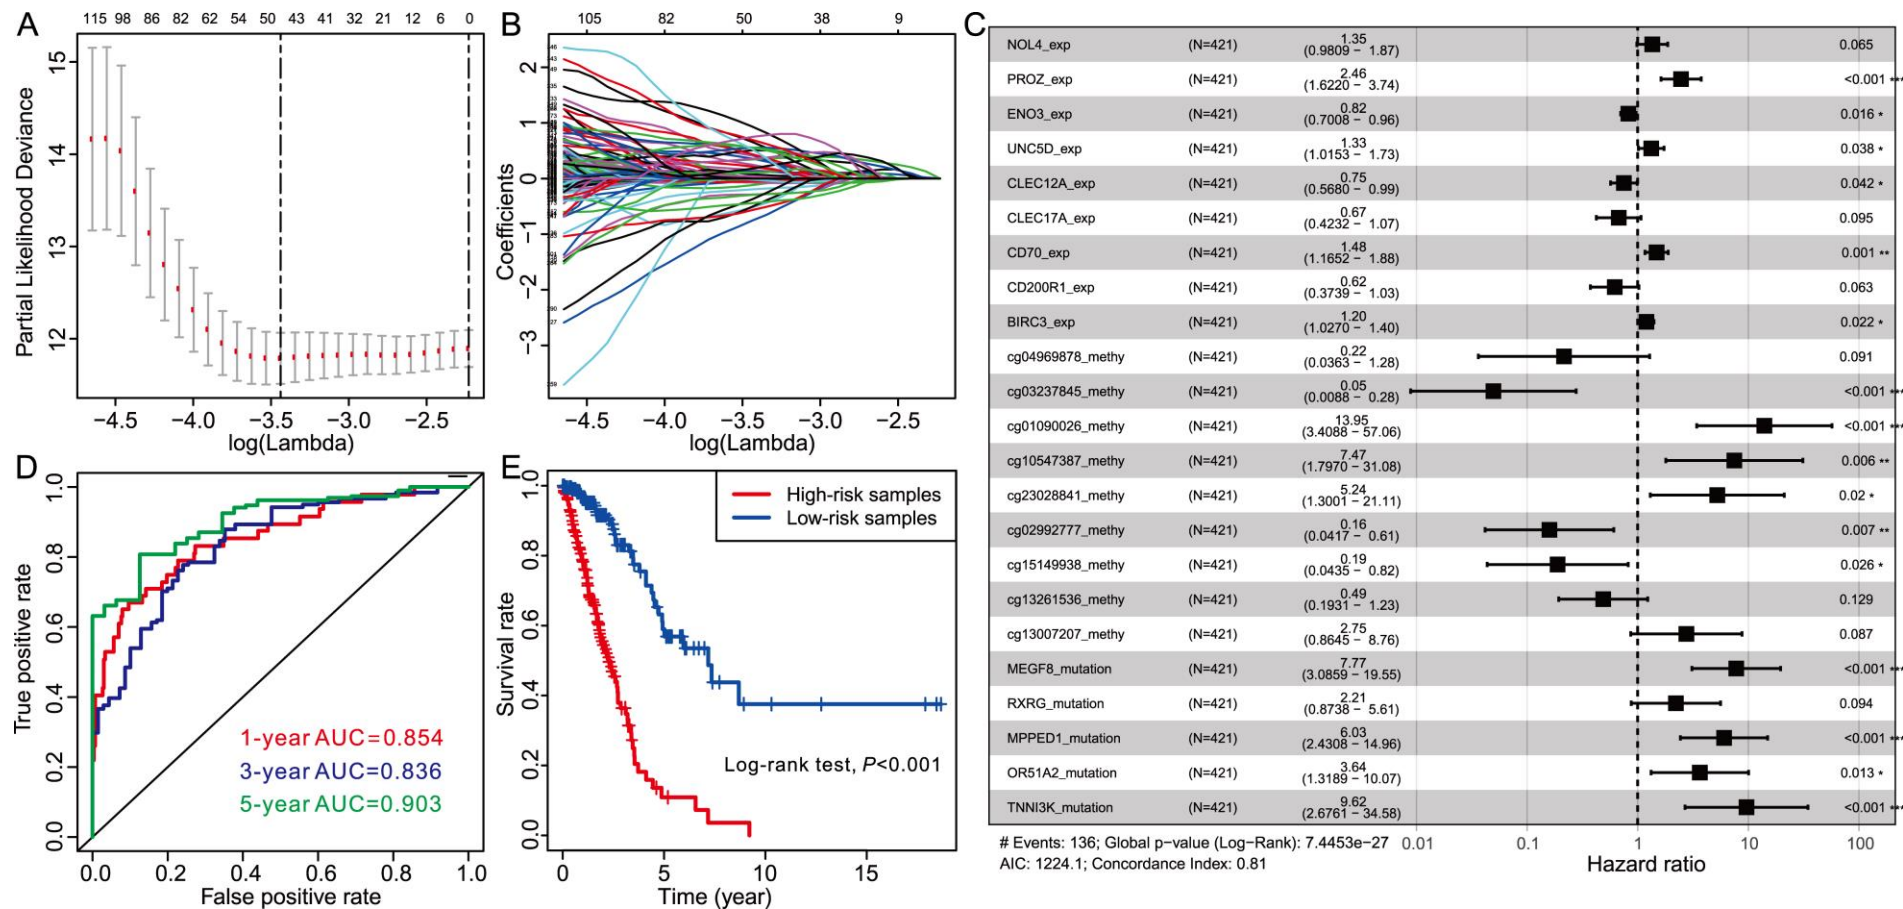

**Figure S10 The prognosis prediction model based on differential mutations, gene expression change and DNA methylation. (A-B)** Identification of the optimal penalization coefficient lambda in Lasso regression model. **(C)** Forest plot of the prognostic impact of 23 variables. **(D)** ROC curves of the risk score for predicting 1-year, 3-year and 5-year survival. **(E)** Kaplan-Meier curves show the independent relevance between overall survival time and risk scores.

# **Supplemental Tables**

**Table S1** The results of pairwise comparisons of estimate score and immune score on tumor size and stage.  
(see Excel file)

**Table S2** The list of the differentially mutated genes between high-immunity and low-immunity cohorts.  
(see Excel file)

**Table S3** The list of the differentially methylated probes.  
(see Excel file)



**Table S4** The list of the hypermethylation-associated DEGs in high-immunity cohort

| <b>Gene_symbol</b> | <b>Expression_status</b> | <b>Methylation_probes</b>                                                     |
|--------------------|--------------------------|-------------------------------------------------------------------------------|
| PYHIN1             | up-regulated             | cg02490589,cg21576886,cg25464787,                                             |
| PIK3R5             | up-regulated             | cg02505918,                                                                   |
| SIRPA              | up-regulated             | cg25458147,                                                                   |
| IL16               | up-regulated             | cg05042034,                                                                   |
| NLRP3              | up-regulated             | cg25602756,cg18126557,cg07164722,                                             |
| BIN2               | up-regulated             | cg02023138,                                                                   |
| CD1E               | up-regulated             | cg09478478,cg10976626,                                                        |
| KLHL6              | up-regulated             | cg02939781,                                                                   |
| DNAJC5B            | up-regulated             | cg21649629,                                                                   |
| LSP1               | up-regulated             | cg23670188,                                                                   |
| IDO1               | up-regulated             | cg24188163,                                                                   |
| RGS1               | up-regulated             | cg22360028,                                                                   |
| XIRP1              | up-regulated             | cg07165610,                                                                   |
| AGAP2              | up-regulated             | cg23377551,cg11511175,cg00769161,cg15539944,cg14845962,cg12116027,            |
| CD244              | up-regulated             | cg13240206,                                                                   |
| SIGLEC14           | up-regulated             | cg03240663,                                                                   |
| HLA-DQA2           | up-regulated             | cg17471365,                                                                   |
| CLEC4G             | up-regulated             | cg05626117,                                                                   |
| RASGRP2            | up-regulated             | cg22749107,                                                                   |
| ACSM5              | up-regulated             | cg02147009,                                                                   |
| IRF4               | up-regulated             | cg17336615,                                                                   |
| CD1B               | up-regulated             | cg04574507,cg15952487,                                                        |
| KRT1               | up-regulated             | cg10538533,cg10926148,                                                        |
| S100B              | up-regulated             | cg11064537,                                                                   |
| IFNG               | up-regulated             | cg01281450,                                                                   |
| LCP2               | up-regulated             | cg21748244,                                                                   |
| IKZF1              | up-regulated             | cg26746878,                                                                   |
| ARHGAP15           | up-regulated             | cg17600630,cg27492839,                                                        |
| LCP1               | up-regulated             | cg11274337,                                                                   |
| FCER1A             | up-regulated             | cg14696870,                                                                   |
| CIITA              | up-regulated             | cg07371747,                                                                   |
| MAP4K1             | up-regulated             | cg05258935,cg08230957,                                                        |
| APOE               | up-regulated             | cg14123992,cg01032398,                                                        |
| CD1C               | up-regulated             | cg09149672,                                                                   |
| HLA-DOA            | up-regulated             | cg18030265,cg09132634,cg26175846,cg18043773,cg17777731,cg07699648,            |
| MNDA               | up-regulated             | cg14216734,                                                                   |
| BLK                | up-regulated             | cg24861686,                                                                   |
| DOCK2              | up-regulated             | cg26794227,cg27591502,cg09175734,cg02732152,cg04730794,cg01057132,cg25076039, |
| APBB1IP            | up-regulated             | cg17954226,                                                                   |
| TLR4               | up-regulated             | cg14629571,                                                                   |
| ARHGAP9            | up-regulated             | cg03886558,                                                                   |
| CMKLR1             | up-regulated             | cg13248299,cg07919167,                                                        |
| ZNF831             | up-regulated             | cg04068564,cg18826352,cg19787906,cg21296613,                                  |
| TNFRSF8            | up-regulated             | cg13689066,                                                                   |
| WIPF1              | up-regulated             | cg11778734,cg24401656,                                                        |
| TNFSF8             | up-regulated             | cg14187242,                                                                   |
| KCNE1              | up-regulated             | cg03123557,                                                                   |

---

|          |                |                                                         |
|----------|----------------|---------------------------------------------------------|
| PRKCB    | up-regulated   | cg00795205,cg04086239,cg07959068,cg06401532,            |
| ACAP1    | up-regulated   | cg08324090,cg25900902,cg19175364,                       |
| FPR1     | up-regulated   | cg17724366,                                             |
| FPR2     | up-regulated   | cg02309029,                                             |
| NLRC3    | up-regulated   | cg02819734,                                             |
| ITGB2    | up-regulated   | cg27103348,                                             |
| CADM3    | up-regulated   | cg11388664,cg24580655,cg01803258,                       |
| LCK      | up-regulated   | cg03243362,                                             |
| RASAL3   | up-regulated   | cg01062942,cg22808633,                                  |
| CD33     | up-regulated   | cg24809544,                                             |
| ASB2     | up-regulated   | cg18485877,                                             |
| SIRPG    | up-regulated   | cg23295754,                                             |
| SIRPB1   | up-regulated   | cg26616780,cg04103198,cg27365103,                       |
| GIMAP4   | up-regulated   | cg00832923,                                             |
| LILRB5   | up-regulated   | cg13535489,                                             |
| MYO1F    | up-regulated   | cg22568423,cg08283130,                                  |
| S100P    | down-regulated | cg22266967,cg14140379,cg14323984,cg27027375,cg14900031, |
| EYS      | down-regulated | cg23028841,                                             |
| CABYR    | down-regulated | cg05060976,cg21978251,                                  |
| SLC38A8  | down-regulated | cg02671204,                                             |
| CGA      | down-regulated | cg12078738,                                             |
| DDC      | down-regulated | cg19107055,                                             |
| GPT2     | down-regulated | cg04839706,                                             |
| FSTL4    | down-regulated | cg09024962,                                             |
| VWA5B2   | down-regulated | cg24363374,                                             |
| MSMB     | down-regulated | cg17030820,                                             |
| F7       | down-regulated | cg01089602,cg24269657,cg20329620,cg08266168,            |
| CRABP1   | down-regulated | cg07199257,                                             |
| ATP4B    | down-regulated | cg15154339,cg05201344,cg01020475,                       |
| LRFN2    | down-regulated | cg18454510,                                             |
| TMED6    | down-regulated | cg18368125,cg27009392,cg16148454,                       |
| DEPDC7   | down-regulated | cg00035630,                                             |
| RNF186   | down-regulated | cg23214395,cg04994456,                                  |
| KCNQ2    | down-regulated | cg04605816,cg01378999,cg13782274,                       |
| PROZ     | down-regulated | cg16019436,                                             |
| ATOH7    | down-regulated | cg00001874,                                             |
| HGD      | down-regulated | cg04546097,                                             |
| GREB1    | down-regulated | cg25744579,cg14653284,                                  |
| GNRH2    | down-regulated | cg01583485,cg23848712,                                  |
| OPRD1    | down-regulated | cg09970593,                                             |
| PROC     | down-regulated | cg10021288,cg22856114,                                  |
| PPARGC1A | down-regulated | cg27514608,                                             |
| PLA2G10  | down-regulated | cg27058221,                                             |
| GAS2     | down-regulated | cg25982561,cg17679980,cg23840044,                       |
| TFF3     | down-regulated | cg21970261,                                             |
| AKR7A3   | down-regulated | cg07447773,                                             |
| ADPRHL1  | down-regulated | cg10624914,cg00767058,                                  |
| GPX2     | down-regulated | cg09643186,cg13844922,cg10880599,                       |

---

**Table S5** The list of the hypomethylation-associated DEGs in high-immunity cohort

| <b>Gene_symbol</b> | <b>Expression_status</b> | <b>Methylation_probes</b> |
|--------------------|--------------------------|---------------------------|
| HLA-B              | up-regulated             | cg25954539,               |
| CASP1              | up-regulated             | cg05671385,               |
| FAM78A             | up-regulated             | cg17936488,               |
| SLAMF8             | up-regulated             | cg07625783,               |
| PSMB9              | up-regulated             | cg07156249,               |
| CARD16             | up-regulated             | cg13775050,               |
| SLA2               | up-regulated             | cg07598052,cg03841065,    |

**Table S6** The list of the genes with expression-methylation correlations in high-immunity cohort  
(see Excel file)

**Table S7** The list of the genes with expression-methylation correlations in low-immunity cohort  
(see Excel file)

**Table S8** The list of 52 reserved variables in the lasso regression model.

| No. | Variables        |
|-----|------------------|
| 1   | PROZ_exp         |
| 2   | FOXN4_exp        |
| 3   | LCN15_exp        |
| 4   | INSL4_exp        |
| 5   | GAS2_exp         |
| 6   | ANKRD18B_exp     |
| 7   | ENO3_exp         |
| 8   | UNC5D_exp        |
| 9   | CLEC12A_exp      |
| 10  | CLEC17A_exp      |
| 11  | CD70_exp         |
| 12  | CD200R1_exp      |
| 13  | PTX3_exp         |
| 14  | ACSM5_exp        |
| 15  | STAP1_exp        |
| 16  | BIRC3_exp        |
| 17  | LILRA4_exp       |
| 18  | MCOLN2_exp       |
| 19  | CCR2_exp         |
| 20  | cg00810292_methy |
| 21  | cg22706883_methy |
| 22  | cg26605164_methy |
| 23  | cg04969878_methy |
| 24  | cg10122865_methy |
| 25  | cg03237845_methy |
| 26  | cg08780166_methy |
| 27  | cg04240491_methy |
| 28  | cg01090026_methy |
| 29  | cg04275847_methy |
| 30  | cg10547387_methy |
| 31  | cg25407540_methy |
| 32  | cg22912095_methy |
| 33  | cg26904049_methy |
| 34  | cg23028841_methy |
| 35  | cg03462901_methy |
| 36  | cg00874480_methy |
| 37  | cg24484802_methy |
| 38  | cg07379581_methy |
| 39  | cg17665652_methy |
| 40  | cg13208438_methy |
| 41  | cg02711212_methy |
| 42  | cg02992777_methy |
| 43  | cg11288144_methy |
| 44  | cg15149938_methy |
| 45  | cg13261536_methy |
| 46  | cg13007207_methy |
| 47  | cg25826515_methy |

---

|    |                  |
|----|------------------|
| 48 | cg00225623_methy |
| 49 | COL22A1_mutation |
| 50 | PTPRT_mutation   |
| 51 | DNAH8_mutation   |
| 52 | DST_mutation     |

---

**Table S9** The table shows the contribution of 27 variables and risk score for each sample  
(see Excel file)
